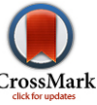

## Correction

# Correction: Can Gas Replace Protein Function? CO Abrogates the Oxidative Toxicity of Myoglobin

The *PLOS ONE* Staff

Figure 9, “Differences in Hb and Mb induced oxidation yield distinct protection mechanisms,” is incorrect. Please see the corrected Figure 9 here.

---

**Citation:** The *PLOS ONE* Staff (2014) Correction: Can Gas Replace Protein Function? CO Abrogates the Oxidative Toxicity of Myoglobin. *PLoS ONE* 9(10): e111565. doi:10.1371/journal.pone.0111565

**Published:** October 15, 2014

**Copyright:** © 2014 The *PLOS ONE* Staff. This is an open-access article distributed under the terms of the Creative Commons Attribution License, which permits unrestricted use, distribution, and reproduction in any medium, provided the original author and source are credited.

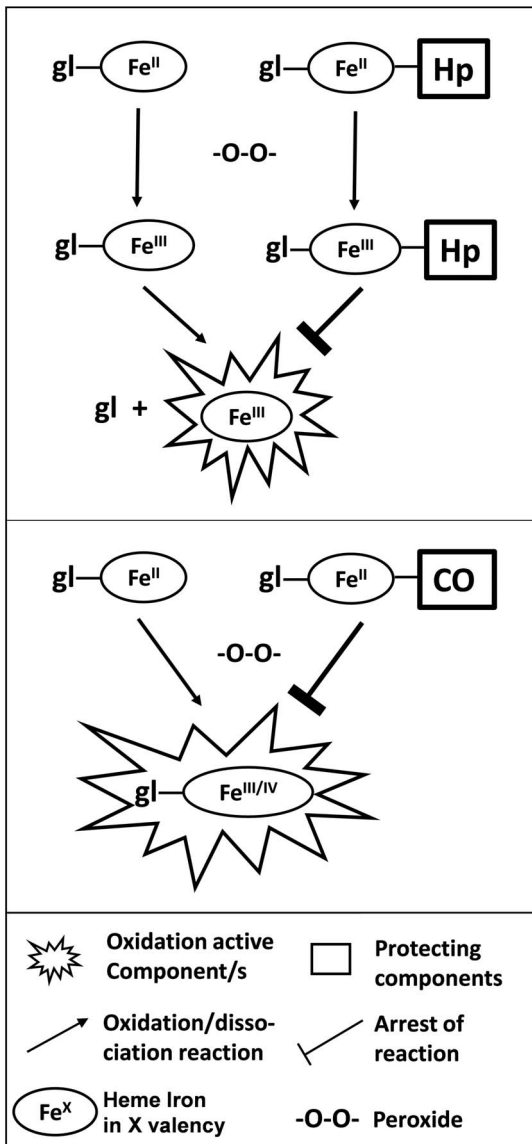

**Figure 9. Differences in Hb and Mb induced oxidation yield distinct protection mechanisms.** In presence of peroxide, ferrous RH are oxidized to their ferric ( $\text{Fe}^{\text{III}}$ ) and/or ferryl ( $\text{Fe}^{\text{IV}}$ ) forms. Upper: Hp binds Hb (ferrous and/or ferric) thereby preventing its release. Lower: Mb heme is retained attached to globin following oxidation in a peroxidase-like form. However, binding of CO to ferrous Mb prevents its oxidation to a 'peroxidase-like form'.  
doi:10.1371/journal.pone.0104075.g009

## Reference

1. Sher EA, Sholto AY, Shaklai M, Shaklai N (2014) Can Gas Replace Protein Function? CO Abrogates the Oxidative Toxicity of Myoglobin. PLoS ONE 9(8): e104075. doi:10.1371/journal.pone.0104075
